# Supplementary material for: The Longin SNARE VAMP7/TI-VAMP Adopts a Closed Conformation
Source: PubMed Central journal article supplement — J Biol Chem. 2010 Apr 8;285(23):17965–73. doi: 10.1074/jbc.M110.120972 (PMC2878558; doi:10.1074/jbc.m110.120972), 2010-04-08

## SUPPLEMENTAL DATA

Supplementary Figure S1. Backbone assignment of the LD in VAMP7(1-118) and VAMP7(1-180). *A.*  $^1\text{H}$ - $^{13}\text{C}$  strips of CBCA(CO)NH and HNCACB spectra are shown for the N-H chemical shifts corresponding to the first seven N-terminal amino acids of the VAMP7(1-118) construct. 14 strips are arranged in pairs (HN(CO)CACB on the left and HNCACB on the right) that are sequentially aligned. Each pair of strips was taken at the  $^{15}\text{N}$  plane corresponding to the amide  $^{15}\text{N}$  chemical shift of the residues indicated below the strips in red boxes. Black lines illustrate the connectivity between sequential  $\text{C}\beta$  (upper lines) and  $\text{C}\alpha$  (lower lines), that produced the assignment of the resonances for the VAMP7a(1-7) region. *B.*  $^1\text{H}$ - $^{13}\text{C}$  strips of HN(CO)CA and HNCA spectra are shown for the N-H chemical shifts corresponding to the first seven N-terminal amino acids of VAMP7(1-180). 14 strips are arranged in pairs (HN(CO)CA on the left and HNCA on the right) that are sequentially aligned. Each pair of strips was taken at the  $^{15}\text{N}$  plane corresponding to the amide  $^{15}\text{N}$  chemical shift of the residues indicated below the stripes in red boxes. Black lines illustrate the connectivity between sequential  $\text{C}\alpha$ .

Supplementary Figure S2. LD dimerization. *A.* Overlay of the  $^1\text{H}$ ,  $^{15}\text{N}$ -HSQC spectra of 18  $\mu\text{M}$  (black) and 450  $\mu\text{M}$  (magenta) VAMP7(1-118). For the 18  $\mu\text{M}$  spectrum (black), the HSQC experiment was set to select only for NH resonances. Top left corner: summary of  $^1\text{H}$  and  $^{15}\text{N}$  combined chemical shift changes in the VAMP7 LD induced by LD dimerization. The combined  $^1\text{H}$  and  $^{15}\text{N}$  chemical shift changes are defined as  $\Delta\text{ppm} = [(\Delta\delta_{\text{HN}})^2 + (\Delta\delta_{\text{N}} \times \alpha_{\text{N}})^2]^{1/2}$ , where  $\Delta\delta_{\text{HN}}$  and  $\Delta\delta_{\text{N}}$  are chemical shift differences of amide proton and nitrogen chemical shifts of the VAMP7 LD in the two different concentrations. The scaling factor ( $\alpha_{\text{N}}$ ) used to normalize the  $^1\text{H}$  and  $^{15}\text{N}$  chemical shifts is 0.17. *B.* Elution profile of SEC-MALS of the isolated LD. Molar mass (red profile) and absorbance at 280 nm (black) (0.5 ml/min).

Supplementary figure S1

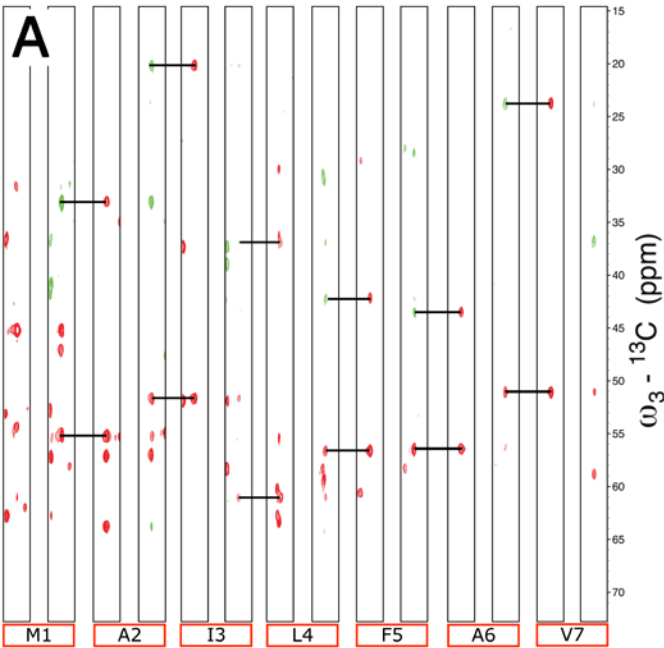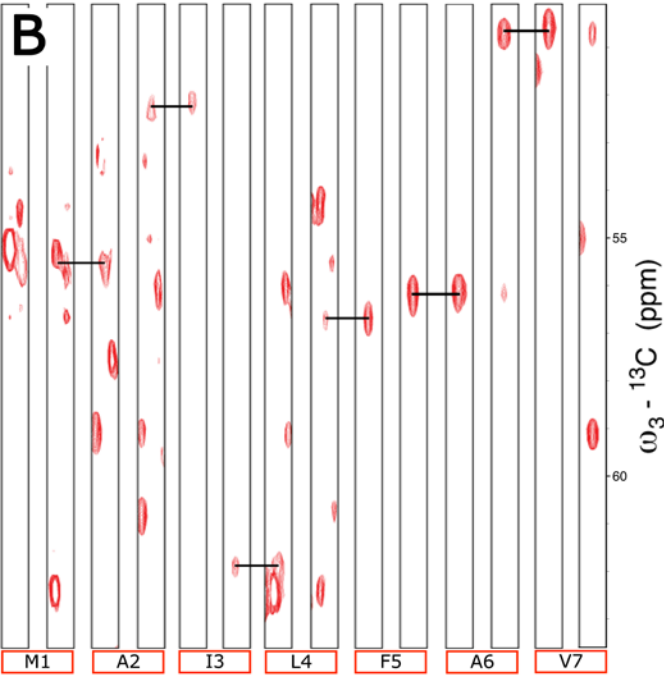

# Supplementary figure S2

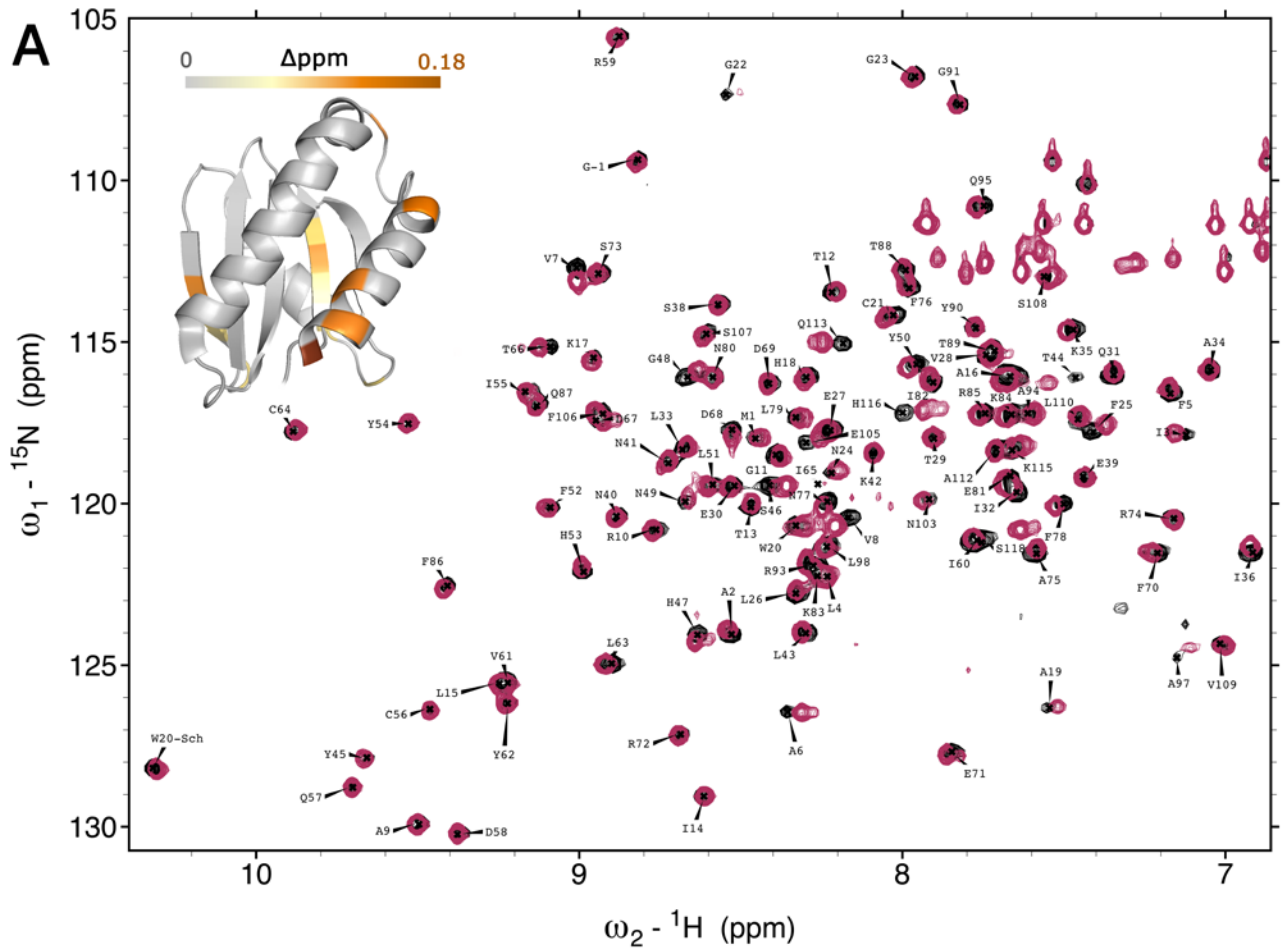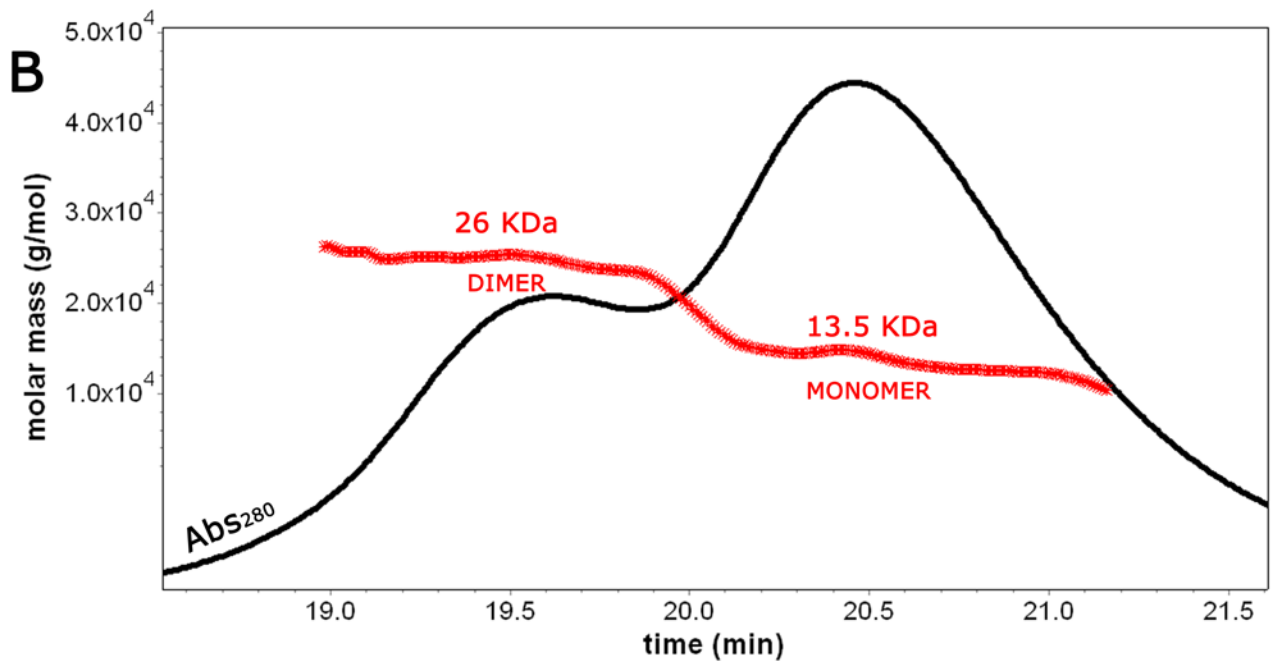

Supplement: supp_M110.120972_jbc.M110.120972-1.pdf [file supp_M110.120972_jbc.M110.120972-1.pdf]
